# Supplementary material for: Exploring the Spatiotemporal Alterations in China’s GPP Based on the DTEC Model
Source: MDPI journal article supplement (doi:10.3390/rs16081361), 2024-04-12
Supplement: s1 [file remotesensing-2905539-supplementary.pdf › remotesensing-2905539-supplementary.pdf]

# Exploring the Spatiotemporal Alterations in China's GPP Based on the DTEC Model

Jie Peng <sup>1,2</sup>, Yayong Xue <sup>1,2,\*</sup>, Naiqing Pan <sup>3</sup>, Yuan Zhang <sup>4</sup>, Haibin Liang <sup>5,6</sup> and Fei Zhang <sup>7</sup>

<sup>1</sup> College of Geography and Remote Sensing Sciences, Xinjiang University, Urumqi 830046, China; pengjie@stu.xju.edu.cn

<sup>2</sup> Xinjiang Key Laboratory of Oasis Ecology, Xinjiang University, Urumqi 830046, China

<sup>3</sup> Schiller Institute for Integrated Science and Society, Boston College, Chestnut Hill, MA 02467, USA; pannai@bc.edu

<sup>4</sup> College of Environmental and Resource Sciences, Shanxi University, Taiyuan 030006, China

<sup>5</sup> Institute of Geographical Science, Taiyuan Normal University, Jinzhong 030619, China

<sup>6</sup> Shanxi Key Laboratory of Earth Surface Processes and Resource Ecological Security in Fenhe River Basin, Taiyuan Normal University, Jinzhong 030619, China

<sup>7</sup> College of Geography and Environmental Sciences, Zhejiang Normal University, Jinhua 321004, China; zhangfei3s@zjnu.edu.cn

\* Correspondence: xueyy@xju.edu.cn

Table S1. Grading of the impact of GPP<sub>CC</sub> and GPP<sub>HA</sub>.

| <i>Slope</i> (GPP) <sup>a</sup> | Degree of impact         |
|---------------------------------|--------------------------|
| ≤ -25                           | Significantly suppressed |
| -25 ~ -5                        | Moderately suppressed    |
| -5 ~ -1                         | Slightly suppressed      |
| -1 ~ 1                          | Stable                   |
| 1 ~ 5                           | Slightly promoted        |
| 5 ~ 25                          | Moderately promoted      |
| ≥ 25                            | Significantly promoted   |

Note: “a” refers to the trend of GPP changes influenced of climate change or anthropogenic activities.

Table S2. Determination Criteria for Drivers of China's GPP Changes and Calculation Method of Contribution Rate.

| <i>Slope</i><br>(GPP) | Driving<br>factors | Predicted and residual            |                                   | Relative contribution (%)                                        |                                                                  |
|-----------------------|--------------------|-----------------------------------|-----------------------------------|------------------------------------------------------------------|------------------------------------------------------------------|
|                       |                    | <i>Slope</i> (GPP <sub>CC</sub> ) | <i>Slope</i> (GPP <sub>HA</sub> ) | <i>C</i> <sub>CC</sub>                                           | <i>C</i> <sub>HA</sub>                                           |
| >0                    | CC&HA              | >0                                | >0                                | $\frac{\text{slope}(\text{GPP}_{CC})}{\text{slope}(\text{GPP})}$ | $\frac{\text{slope}(\text{GPP}_{HA})}{\text{slope}(\text{GPP})}$ |
|                       | CC                 | >0                                | <0                                | 100                                                              | 0                                                                |
|                       | HA                 | <0                                | >0                                | 0                                                                | 100                                                              |
| <0                    | CC&HA              | <0                                | <0                                | $\frac{\text{slope}(\text{GPP}_{CC})}{\text{slope}(\text{GPP})}$ | $\frac{\text{slope}(\text{GPP}_{HA})}{\text{slope}(\text{GPP})}$ |
|                       | CC                 | <0                                | >0                                | 100                                                              | 0                                                                |
|                       | HA                 | >0                                | <0                                | 0                                                                | 100                                                              |

Where CC and HA represent climate change and human activities, respectively; *C*<sub>CC</sub> and *C*<sub>HA</sub> represent the contributions of climatic factors and human activities to GPP; and GPP<sub>CC</sub> and GPP<sub>HA</sub> represent the trend values of CC and HA.

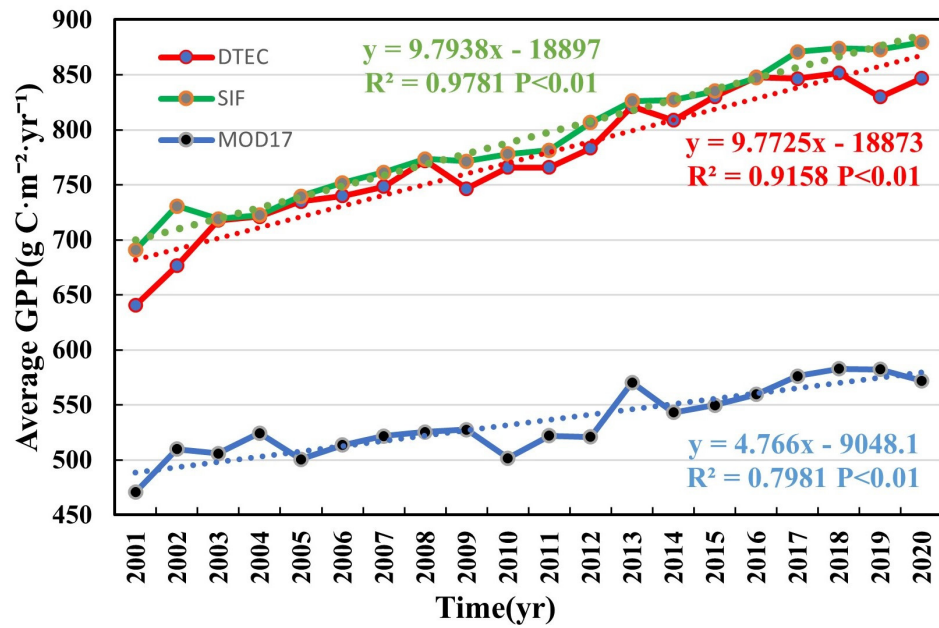

Figure S1. Inter-annual changes in China's GPP from 2001 to 2020, where DTEC stands for the simulated value of the DTEC model, SIF stands for the simulated value of the GO-SIF model, and MOD17 stands for the simulated value of the MOD17 model.

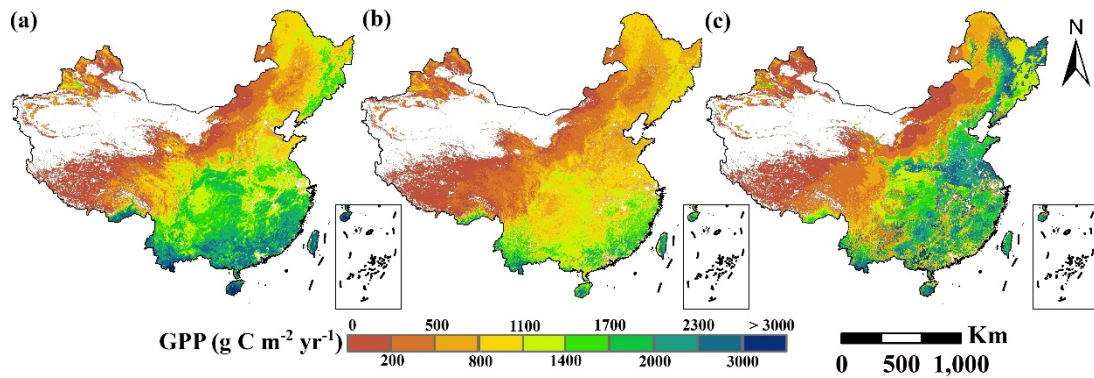

Figure S2. Spatial distribution of the annual mean values of GPP from 2001 to 2020: GO-SIF (a), MOD17 (b), and DTEC(c). Among them, the darker the blue color, the higher the value of GPP in the region.

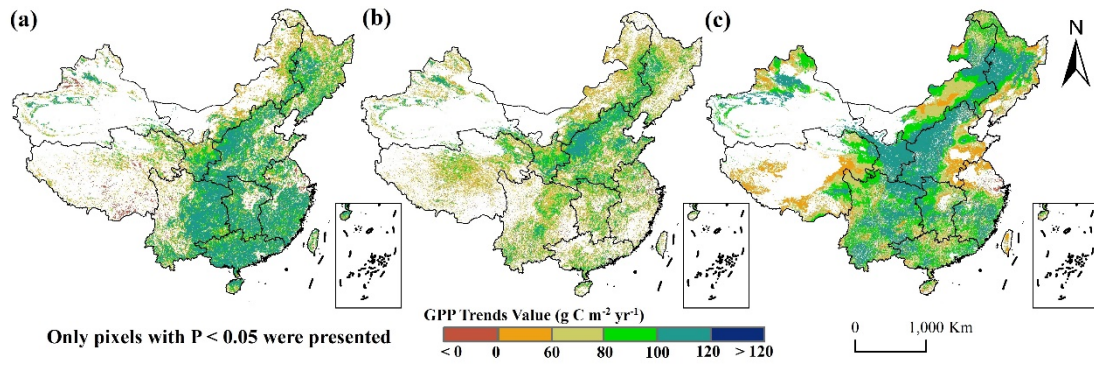

Figure S3. Spatial distribution of GPP passing the significance test for 2001-2020: GO-SIF (a), MOD17 (b), and DTEC (c). Among them, the darker the blue color, the higher the trend of GPP growth in the region.

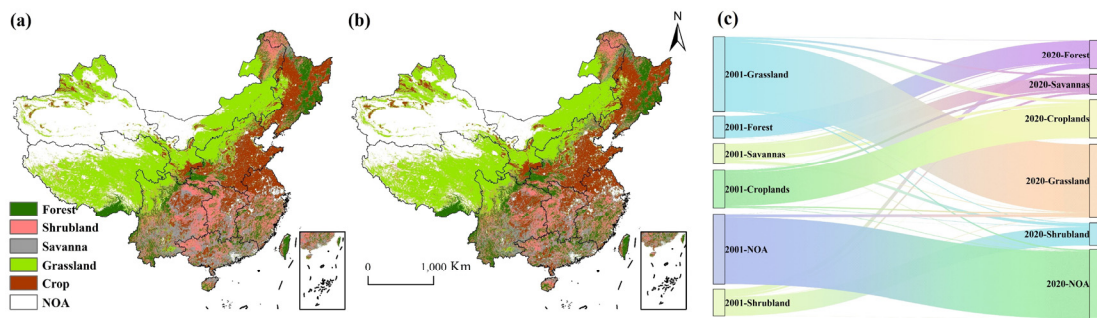

Figure S4. Spatial distribution of land use types in China from 2001 (a) to 2020 (b) and conversion between different land use types from 2001 to 2020 (c). The land use types in China were resampled into six: forest, shrubland, savanna, grassland, crop, and non-vegetated area (NOA).
